# Supplementary material for: Genetic and Transcriptomic Background of Oxidative Stress and Antioxidative Therapies in Late Complications of Type 2 Diabetes Mellitus: A Systematic Review
Source: MDPI journal article supplement (doi:10.3390/antiox13030277), 2024-02-24
Supplement: s1 [file s1]

| Supplementary file 3: Studies excluded from the 2 <sup>nd</sup> search                                                                                                                                                                                                                                                                                                                                  | Exclusion criteria                                                              |
|---------------------------------------------------------------------------------------------------------------------------------------------------------------------------------------------------------------------------------------------------------------------------------------------------------------------------------------------------------------------------------------------------------|---------------------------------------------------------------------------------|
| Xia J, Yu J, Xu H, Zhou Y, Li H, Yin S, Xu D, Wang Y, Xia H, Liao W, Wang S, Sun G. 2023. Comparative effects of vitamin and mineral supplements in the management of type 2 diabetes in primary care: A systematic review and network meta-analysis of randomized controlled trials. PMID: 36638933. doi:10.1016/j.phrs.2023.106647                                                                    | Ineligible study type                                                           |
| Karimzadeh L, Behrouz V, Sohrab G, Hedayati M, Emami G. 2022. A randomized clinical trial of beetroot juice consumption on inflammatory markers and oxidative stress in patients with type 2 diabetes. PMID: 36342289. doi:10.1111/1750-3841.16365                                                                                                                                                      | Study did not include predetermined outcomes, related to diabetic complications |
| Amini P, Sajedi F, Mirjalili M, Mohammadi Y, Mehrpooya M. 2022. Coenzyme Q10 as a potential add-on treatment for patients suffering from painful diabetic neuropathy: results of a placebo-controlled randomized trial. PMID: 36273066. doi:10.1007/s00228-022-03407-x                                                                                                                                  | Article could not be accessed                                                   |
| Karimzadeh L, Sohrab G, Hedayati M, Ebrahimof S, Emami G, Razavion T. 2023. Effects of concentrated beetroot juice consumption on glycemic control, blood pressure, and lipid profile in type 2 diabetes patients: randomized clinical trial study. PMID: 35869311. doi:10.1007/s11845-022-03090-y                                                                                                      | Study did not include predetermined outcomes, related to diabetic complications |
| Huo J, Xue Y, Dong X, Lv J, Wu L, Gao H, Yang X, Liu H, Gao Q. 2023. Efficacy of vitamin and antioxidant supplements for treatment of diabetic peripheral neuropathy: systematic review and meta-analysis of randomized controlled trials. PMID: 35816410. doi:10.1080/1028415X.2022.2090606                                                                                                            | Ineligible study type                                                           |
| Ou T, Wang W, Yong H, Hao H, Wang R, Dai X, Wang D, Li Y. 2022. Liraglutide Plus Dapagliflozin for High Uric Acid and Microalbuminuria in Diabetes Mellitus Complicated With Metabolic Syndrome. PMID: 35751892. doi:                                                                                                                                                                                   | Study did not include predetermined outcomes, related to diabetic complications |
| Guo Y, Liu S, Xu H. 2022. Uric Acid and Diabetic Retinopathy: A Systematic Review and Meta-Analysis. PMID: 35712295. doi:10.3389/fpubh.2022.906760                                                                                                                                                                                                                                                      | Ineligible study type                                                           |
| Kharitonova T, Shvarts YG, Verbovoy AF, Orlova NS, Puzyreva VP, Stokov IA. 2022. Efficacy and safety of the combined metabolic medication, containing inosine, nicotinamide, riboflavin and succinic acid, for the treatment of diabetic neuropathy: a multicenter randomized, double-blind, placebo-controlled parallel group clinical trial (CYLINDER). PMID: 35680173. doi:10.1136/bmjdr-2022-002785 | Study did not include predetermined outcomes, related to diabetic complications |
| Dai Y, Quan J, Xiong L, Luo Y, Yi B. 2022. Probiotics improve renal function, glucose, lipids, inflammation and oxidative stress in diabetic kidney disease: a systematic review and meta-analysis. PMID: 35611435. doi:10.1080/0886022X.2022.2079522                                                                                                                                                   | Ineligible study type                                                           |
| Segar MW, Kolkailah AA, Frederich R, Pong A, Cannon CP, Cosentino F, Dagogo-Jack S, McGuire DK, Pratley RE, Liu CC, Maldonado M, Liu J, Cater NB, Pandey A, Cherney DZI. 2022. Mediators of ertugliflozin effects on heart failure and kidney outcomes among patients with type 2 diabetes mellitus. PMID: 35603908. doi:10.1111/dom.14769                                                              | Study did not include predetermined outcomes, related to diabetic complications |
| Macena ML, Nunes LFDS, da Silva AF, Pureza IROM, Praxedes DRS, Santos JCF, Bueno NB. 2022. Effects of dietary polyphenols in the glycemic, renal, inflammatory, and oxidative stress biomarkers in diabetic nephropathy: a                                                                                                                                                                              | Ineligible study type                                                           |

|                                                                                                                                                                                                                                                                                                                                                                                 |                                                                                 |
|---------------------------------------------------------------------------------------------------------------------------------------------------------------------------------------------------------------------------------------------------------------------------------------------------------------------------------------------------------------------------------|---------------------------------------------------------------------------------|
| systematic review with meta-analysis of randomized controlled trials. PMID: 35595310. doi:10.1093/nutrit/nuac035                                                                                                                                                                                                                                                                |                                                                                 |
| Ali Sangouni A, Abdollahi S, Mozaffari-Khosravi H. 2022. Effect of resveratrol supplementation on hepatic steatosis and cardiovascular indices in overweight subjects with type 2 diabetes: a double-blind, randomized controlled trial. PMID: 35538431. doi:10.1186/s12872-022-02637-2                                                                                         | Study did not include predetermined outcomes, related to diabetic complications |
| Bakris GL, Mikami H, Hirata M, Nakajima A, Cressman MD. 2021. A Non-purine Xanthine Oxidoreductase Inhibitor Reduces Albuminuria in Patients with DKD: A Randomized Controlled Trial. PMID: 35369650. doi:10.34067/KID.0001672021                                                                                                                                               | Drug effect study                                                               |
| Talari HR, Tabatabaei SMH, Soleimani A, Sayyah M, Bozorgi M. 2022. The effects of melatonin administration on carotid intima-media thickness and pulse wave velocity in diabetic nephropathy: A randomized, double-blind, placebo-controlled trial. PMID: 35331538. doi:10.1016/j.clnesp.2022.01.002                                                                            | Article could not be accessed                                                   |
| Suijk DLS, van Baar MJB, van Bommel EJM, Iqbal Z, Krebber MM, Vallon V, Touw D, Hoorn EJ, Nieuwdorp M, Kramer MMH, Joles JA, Bjornstad P, van Raalte DH. 2022. SGLT2 Inhibition and Uric Acid Excretion in Patients with Type 2 Diabetes and Normal Kidney Function. PMID: 35322793. doi:10.2215/CJN.11480821                                                                   | Study did not include predetermined outcomes, related to diabetic complications |
| Zhong O, Hu J, Wang J, Tan Y, Hu L, Lei X. 2022. Antioxidant for treatment of diabetic complications: A meta-analysis and systematic review. PMID: 35307907. doi:10.1002/jbt.23038                                                                                                                                                                                              | Ineligible study type                                                           |
| Ji P, Zhu J, Feng J, Li H, Yu Q, Qin H, Wei L, Zhang J. 2022. Serum uric acid levels and diabetic kidney disease in patients with type 2 diabetes mellitus: A dose-response meta-analysis. PMID: 35305901. doi:10.1016/j.pcd.2022.03.003                                                                                                                                        | Ineligible study type                                                           |
| Tabaei BS, Mousavi SN, Rahimian A, Rostamkhani H, Mellati AA, Jameshorani M. 2022. Co-Administration of Vitamin E and Atorvastatin Improves Insulin Sensitivity and Peroxisome Proliferator-Activated Receptor- $\gamma$ Expression in Type 2 Diabetic Patients: A Randomized Double-Blind Clinical Trial. PMID: 35291435. doi:10.30476/ijms.2021.89102.1981                    | Study did not include predetermined outcomes, related to diabetic complications |
| Grabež M, Škrbić R, Stojiljković MP, Vučić V, Rudić Grujić V, Jakovljević V, Djurić DM, Suručić R, Šavikin K, Bigović D, Vasiljević N. 2022. A prospective, randomized, double-blind, placebo-controlled trial of polyphenols on the outcomes of inflammatory factors and oxidative stress in patients with type 2 diabetes mellitus. PMID: 35229548. doi:10.31083/j.rcm2302057 | Study did not include predetermined outcomes, related to diabetic complications |
| Wu B, Chen L, Xu Y, Duan Q, Zheng Z, Zheng Z, He D. 2022. The Effect of Allopurinol on Renal Outcomes in Patients with Diabetic Kidney Disease: A Systematic Review and Meta-Analysis. PMID: 35130544. doi:10.1159/000522248                                                                                                                                                    | Ineligible study type                                                           |
| Xiong R, Yuan Y, Zhu Z, Wu Y, Ha J, Han X, Wang W, He M. 2022. Micronutrients and Diabetic Retinopathy: Evidence From The National Health and Nutrition Examination Survey and a Meta-analysis. PMID: 35033539. doi:10.1016/j.ajo.2022.01.005                                                                                                                                   | Article could not be accessed                                                   |
| Abdelhaleem IA, Brakat AM, Adayel HM, Asla MM, Rizk MA, Aboalfetoh AY. 2022. The effects of resveratrol on glycemic control and cardiometabolic parameters in patients with T2DM: A systematic review and meta-analysis. PMID: 34666902. doi:10.1016/j.medcli.2021.06.028                                                                                                       | Ineligible study type                                                           |

|                                                                                                                                                                                                                                                                                                                                           |                                                                                 |
|-------------------------------------------------------------------------------------------------------------------------------------------------------------------------------------------------------------------------------------------------------------------------------------------------------------------------------------------|---------------------------------------------------------------------------------|
| Cojic M, Kocic R, Klisic A, Kocic G. 2021. The Effects of Vitamin D Supplementation on Metabolic and Oxidative Stress Markers in Patients With Type 2 Diabetes: A 6-Month Follow Up Randomized Controlled Study. PMID: 34489860. doi:10.3389/fendo.2021.610893                                                                            | Study did not include predetermined outcomes, related to diabetic complications |
| Sun F, Jiang D, Cai J. 2021. Effects of valsartan combined with $\alpha$ -lipoic acid on renal function in patients with diabetic nephropathy: a systematic review and meta-analysis. PMID: 34465338. doi:10.1186/s12902-021-00844-0                                                                                                      | Ineligible study type                                                           |
| Leehey DJ, Carlson K, Reda DJ, Craig I, Clise C, Conner TA, Agarwal R, Kaufman JS, Anderson RJ, Lammie D, Huminik J, Polzin L, McBurney C, Huang GD, Emanuele NV. 2021. Pentoxifylline in diabetic kidney disease (VA PTXRx): protocol for a pragmatic randomised controlled trial. PMID: 34400461. doi:10.1136/bmjopen-2021-053019       | Drug effect study                                                               |
| Shokri M, Sajedi F, Mohammadi Y, Mehrpooya M. 2021. Adjuvant use of melatonin for relieving symptoms of painful diabetic neuropathy: results of a randomized, double-blinded, controlled trial. PMID: 34121140. doi:10.1007/s00228-021-03170-5                                                                                            | Study did not include predetermined outcomes, related to diabetic complications |
| Mahjabeen W, Khan DA, Mirza SA, Pervez MA. 2021. Effects of delta-tocotrienol supplementation on Glycemic Control, oxidative stress, inflammatory biomarkers and miRNA expression in type 2 diabetes mellitus: A randomized control trial. PMID: 33899292. doi:10.1002/ptr.7113                                                           | Study did not include predetermined outcomes, related to diabetic complications |
| Behrouz V, Sohrab G, Hedayati M, Sedaghat M. 2021. Inflammatory markers response to crocin supplementation in patients with type 2 diabetes mellitus: A randomized controlled trial. PMID: 33856733. doi:10.1002/ptr.7124                                                                                                                 | Study did not include predetermined outcomes, related to diabetic complications |
| Venugopal V, Geethanjali S, Poonguzhali S, Padmavathi R, Mahadevan S, Silambanan S, Maheshkumar K. 2022. Effect of Yoga on Oxidative Stress in Type 2 Diabetes Mellitus: A Systematic Review and Meta-analysis. PMID: 33820522. doi:10.2174/1573399817666210405104335                                                                     | Ineligible study type                                                           |
| Bazyar H, Zare Javid A, Bavi Behbahani H, Moradi F, Moradi Poode B, Amiri P. 2021. Consumption of melatonin supplement improves cardiovascular disease risk factors and anthropometric indices in type 2 diabetes mellitus patients: a double-blind, randomized, placebo-controlled trial. PMID: 33766084. doi:10.1186/s13063-021-05174-z | Study did not include predetermined outcomes, related to diabetic complications |
| Satari M, Bahmani F, Reiner Z, Soleimani A, Aghadavod E, Kheiripour N, Asemi Z. 2021. Metabolic and Anti-inflammatory Response to Melatonin Administration in Patients with Diabetic Nephropathy. PMID: 33492301. doi:                                                                                                                    | Study did not include predetermined outcomes, related to diabetic complications |
| Mason SA, Keske MA, Wadley GD. 2021. Effects of Vitamin C Supplementation on Glycemic Control and Cardiovascular Risk Factors in People With Type 2 Diabetes: A GRADE-Assessed Systematic Review and Meta-analysis of Randomized Controlled Trials. PMID: 33472962. doi:10.2337/dc20-1893                                                 | Ineligible study type                                                           |
| Guan H, Ye M, Fang C, Zhang L, Han P, Qiu S, Fang X, Li L. 2020. The clinical effectiveness and safety of alprostadil combined with alpha lipoic acid in the treatment of diabetic peripheral neuropathy: A protocol for systematic review and meta-analysis. PMID: 33327292. doi:10.1097/MD.00000000000023507                            | Ineligible study type                                                           |

|                                                                                                                                                                                                                                                                                                                                                                                                                                                             |                                                                                      |
|-------------------------------------------------------------------------------------------------------------------------------------------------------------------------------------------------------------------------------------------------------------------------------------------------------------------------------------------------------------------------------------------------------------------------------------------------------------|--------------------------------------------------------------------------------------|
| AbdelQadir YH, Hamdallah A, Sibaey EA, Hussein AS, Abdelaziz M, AbdelAzim A, Ragab KM, Helmy SK, Nourelden AZ. 2020. Efficacy of probiotic supplementation in patients with diabetic nephropathy: A systematic review and meta-analysis. PMID: 33183573. doi:10.1016/j.clnesp.2020.06.019                                                                                                                                                                   | Ineligible study type                                                                |
| Zitouni K, Steyn MRCP, Lyka E, Kelly FJ, Cook P, Ster IC, Earle KA. 2020. Derepression of glomerular filtration, renal blood flow and antioxidant defence in patients with type 2 diabetes at high-risk of cardiorenal disease. PMID: 33039650. doi:10.1016/j.freeradbiomed.2020.10.005                                                                                                                                                                     | Study did not include predetermined outcomes, related to diabetic complications      |
| Gunton JE, Girgis CM, Lau T, Vicaretti M, Begg L, Flood V. 2021. Vitamin C improves healing of foot ulcers: a randomised, double-blind, placebo-controlled trial. PMID: 32981536. doi:10.1017/S0007114520003815                                                                                                                                                                                                                                             | Study conducted on non-target group of patients (non-diabetic, diabetes type 1 etc.) |
| Shimizu W, Kubota Y, Hoshika Y, Mozawa K, Tara S, Tokita Y, Yodogawa K, Iwasaki YK, Yamamoto T, Takano H, Tsukada Y, Asai K, Miyamoto M, Miyauchi Y, Kodani E, Ishikawa M, Maruyama M, Ogano M, Tanabe J; EMBODY trial investigators. 2020. Effects of empagliflozin versus placebo on cardiac sympathetic activity in acute myocardial infarction patients with type 2 diabetes mellitus: the EMBODY trial. PMID: 32977831. doi:10.1186/s12933-020-01127-z | Drug effect study                                                                    |
| Poulsen NB, Lambert MNT, Jeppesen PB. 2020. The Effect of Plant Derived Bioactive Compounds on Inflammation: A Systematic Review and Meta-Analysis. PMID: 32761736. doi:10.1002/mnfr.202000473                                                                                                                                                                                                                                                              | Ineligible study type                                                                |
| Pingali U, Sukumaran D, Nutalapati C. 2020. Effect of an aqueous extract of Terminalia chebula on endothelial dysfunction, systemic inflammation, and lipid profile in type 2 diabetes mellitus: A randomized double-blind, placebo-controlled clinical study. PMID: 32618037. doi:10.1002/ptr.6771                                                                                                                                                         | Study did not include predetermined outcomes, related to diabetic complications      |
| Shi J, Cheng Z, Qiu S, Cui H, Gu Y, Zhao Q, Ren Y, Zhang H, Sun H, Liu Y, Li Y, Qiao Y, Hu Y, Liu Y, Cheng Y. 2020. $\epsilon$ 2 allele and $\epsilon$ 2-involved genotypes ( $\epsilon$ 2/ $\epsilon$ 2, $\epsilon$ 2/ $\epsilon$ 3, and $\epsilon$ 2/ $\epsilon$ 4) may confer the association of APOE genetic polymorphism with risks of nephropathy in type 2 diabetes: a meta-analysis. PMID: 32534589. doi:10.1186/s12944-020-01307-6                 | Study did not include predetermined outcomes, related to diabetic complications      |
| Batista-Jorge GC, Barcala-Jorge AS, Silveira MF, Lelis DF, Andrade JMO, de Paula AMB, Guimarães ALS, Santos SHS. 2020. Oral resveratrol supplementation improves Metabolic Syndrome features in obese patients submitted to a lifestyle-changing program. PMID: 32534040. doi:10.1016/j.lfs.2020.117962                                                                                                                                                     | Study did not include predetermined outcomes, related to diabetic complications      |
| El-Nahas MR, Elkannishy G, Abdelhafez H, Elkhamisy ET, El-Sehrawy AA. 2020. Oral Alpha Lipoic Acid Treatment for Symptomatic Diabetic Peripheral Neuropathy: A Randomized Double-Blinded Placebo-Controlled Study. PMID: 32370731. doi:10.2174/1871530320666200506081407                                                                                                                                                                                    | Article could not be accessed                                                        |
| Golpour P, Nourbakhsh M, Mazaherioun M, Janani L, Nourbakhsh M, Yaghmaei P. 2020. Improvement of NRF2 gene expression and antioxidant status in patients with type 2 diabetes mellitus after supplementation with omega-3 polyunsaturated fatty acids: A double-blind randomised placebo-controlled clinical trial. PMID: 32194222. doi:10.1016/j.diabres.2020.108120                                                                                       | Study did not include predetermined outcomes, related to diabetic complications      |
| Dludla PV, Silvestri S, Orlando P, Gabuza KB, Mazibuko-Mbeje SE, Nyambuya TM, Mxinwa V, Mokgalaboni K, Johnson R, Muller CJF, Tiano L, Louw J, Nkambule BB. 2020. Exploring the Comparative Efficacy of Metformin and Resveratrol in the                                                                                                                                                                                                                    | Ineligible study type                                                                |

|                                                                                                                                                                                                                                                                                                                                                                          |                                                                                 |
|--------------------------------------------------------------------------------------------------------------------------------------------------------------------------------------------------------------------------------------------------------------------------------------------------------------------------------------------------------------------------|---------------------------------------------------------------------------------|
| Management of Diabetes-associated Complications: A Systematic Review of Preclinical Studies. PMID: 32168855. doi:10.3390/nu12030739                                                                                                                                                                                                                                      |                                                                                 |
| Çetinkalp Ş, Gökçe EH, Şimşir I, Tuncay Tanrıverdi S, Doğan F, Biray Avcı Ç, Eroğlu İ, Utku T, Gündüz C, Özer Ö. 2021. Comparative Evaluation of Clinical Efficacy and Safety of Collagen Laminin-Based Dermal Matrix Combined With Resveratrol Microparticles (Dermalix) and Standard Wound Care for Diabetic Foot Ulcers. PMID: 32131656. doi:10.1177/1534734620907773 | Study did not include predetermined outcomes, related to diabetic complications |
| Tanaka M, Yamakage H, Inoue T, Odori S, Kusakabe T, Shimatsu A, Satoh-Asahara N. 2020. Beneficial Effects of Ipragliflozin on the Renal Function and Serum Uric Acid Levels in Japanese Patients with Type 2 Diabetes: A Randomized, 12-week, Open-label, Active-controlled Trial. PMID: 32115517. doi:10.2169/internalmedicine.3473-19                                  | Drug effect study                                                               |
| Verma S, Ji Q, Bhatt DL, Mazer CD, Al-Omran M, Inzucchi SE, Wanner C, Ofstad AP, Zwiener I, George JT, Zinman B, Fitchett D. 2020. Association between uric acid levels and cardio-renal outcomes and death in patients with type 2 diabetes: A subanalysis of EMPA-REG OUTCOME. PMID: 32030863. doi:10.1111/dom.13991                                                   | Study did not include predetermined outcomes, related to diabetic complications |
| Matter RM, Elbarbary NS, Ismail EAR, Darwish YW, Nada AS, Banoub VP. 2020. Zinc supplementation improves glucose homeostasis in patients with $\beta$ -thalassemia major complicated with diabetes mellitus: A randomized controlled trial. PMID: 32007694. doi:10.1016/j.nut.2019.110702                                                                                | Study did not include predetermined outcomes, related to diabetic complications |
| Gallelli G, Cione E, Serra R, Leo A, Citraro R, Matricardi P, Di Meo C, Bisceglia F, Caroleo MC, Basile S, Gallelli L. 2020. Nano-hydrogel embedded with quercetin and oleic acid as a new formulation in the treatment of diabetic foot ulcer: A pilot study. PMID: 31876118. doi:10.1111/iwj.13299                                                                     | Study did not include predetermined outcomes, related to diabetic complications |
| Farhangi MA, Dehghan P, Namazi N. 2020. Prebiotic supplementation modulates advanced glycation end-products (AGEs), soluble receptor for AGEs (sRAGE), and cardiometabolic risk factors through improving metabolic endotoxemia: a randomized-controlled clinical trial. PMID: 31728681. doi:10.1007/s00394-019-02140-z                                                  | Study did not include predetermined outcomes, related to diabetic complications |
| Jiang Z, Tan Z, Meng F, Li X. 2019. Curative Effects of Valsartan Alone or Combined with Alpha-lipoic Acid on Inflammatory Cytokines and Renal Function in Early-stage Diabetic Kidney Disease. PMID: 31564281. doi:10.29271/jcpsp.2019.10.1009                                                                                                                          | Article could not be accessed                                                   |
| Shao Y, Shao H, Sawhney MS, Shi L. 2019. Serum uric acid as a risk factor of all-cause mortality and cardiovascular events among type 2 diabetes population: Meta-analysis of correlational evidence. PMID: 31439471. doi:10.1016/j.jdiacomp.2019.07.006                                                                                                                 | Study did not include predetermined outcomes, related to diabetic complications |
| Srinivasan A, Selvarajan S, Kamalanathan S, Kadhiraan T, Prasanna Lakshmi NC, Adithan S. 2019. Effect of Curcuma longa on vascular function in native Tamilians with type 2 diabetes mellitus: A randomized, double-blind, parallel arm, placebo-controlled trial. PMID: 31155769. doi:10.1002/ptr.6381                                                                  | Study did not include predetermined outcomes, related to diabetic complications |
| Nazem MR, Asadi M, Jabbari N, Allameh A. 2019. Effects of zinc supplementation on superoxide dismutase activity and gene expression, and metabolic parameters in overweight type 2 diabetes patients: A randomized, double-blind, controlled trial. PMID: 31129183. doi:10.1016/j.clinbiochem.2019.05.008                                                                | Study did not include predetermined outcomes, related to diabetic complications |

|                                                                                                                                                                                                                                                                                                                                                                                                                                                     |                                                                                      |
|-----------------------------------------------------------------------------------------------------------------------------------------------------------------------------------------------------------------------------------------------------------------------------------------------------------------------------------------------------------------------------------------------------------------------------------------------------|--------------------------------------------------------------------------------------|
| Farajbakhsh A, Mazloomi SM, Mazidi M, Rezaie P, Akbarzadeh M, Ahmad SP, Ferns GA, Ofori-Asenso R, Babajafari S. 2019. Sesame oil and vitamin E co-administration may improve cardiometabolic risk factors in patients with metabolic syndrome: a randomized clinical trial. PMID: 31089253. doi:10.1038/s41430-019-0438-5                                                                                                                           | Study did not include predetermined outcomes, related to diabetic complications      |
| Dong L, Li J, Lian Y, Tang ZX, Zen Z, Yu P, Li Y. 2019. Long-Term Intensive Lifestyle Intervention Promotes Improvement of Stage III Diabetic Nephropathy. PMID: 31022160. doi:10.12659/MSM.913512                                                                                                                                                                                                                                                  | Study conducted on non-target group of patients (non-diabetic, diabetes type 1 etc.) |
| de Morales AM, Goicoechea M, Verde E, Carbayo J, Barbieri D, Delgado A, Verdalles U, de Jose AP, Luño J. 2019. Pentoxifylline, progression of chronic kidney disease (CKD) and cardiovascular mortality: long-term follow-up of a randomized clinical trial. PMID: 30949987. doi:10.1007/s40620-019-00607-0                                                                                                                                         | Drug effect study                                                                    |
| Afsharpour F, Javadi M, Hashemipour S, Koushan Y, Haghighian HK. 2019. Propolis supplementation improves glycemic and antioxidant status in patients with type 2 diabetes: A randomized, double-blind, placebo-controlled study. PMID: 30935545. doi:10.1016/j.ctim.2019.03.001                                                                                                                                                                     | Study did not include predetermined outcomes, related to diabetic complications      |
| Adibian M, Hodaei H, Nikpayam O, Sohrab G, Hekmatdoost A, Hedayati M. 2019. The effects of curcumin supplementation on high-sensitivity C-reactive protein, serum adiponectin, and lipid profile in patients with type 2 diabetes: A randomized, double-blind, placebo-controlled trial. PMID: 30864188. doi:10.1002/ptr.6328                                                                                                                       | Study did not include predetermined outcomes, related to diabetic complications      |
| Aslanabadi N, Afsar Gharebagh R, Moharramzadeh S, Entezari-Maleki T. 2019. Pentoxifylline for the prevention of contrast-induced nephropathy in diabetic patients undergoing angioplasty: a randomized controlled trial. PMID: 30830654. doi:10.1007/s11255-019-02104-6                                                                                                                                                                             | Drug effect study                                                                    |
| Afzali H, Jafari Kashi AH, Momen-Heravi M, Razzaghi R, Amirani E, Bahmani F, Gilasi HR, Asemi Z. 2019. The effects of magnesium and vitamin E co-supplementation on wound healing and metabolic status in patients with diabetic foot ulcer: A randomized, double-blind, placebo-controlled trial. PMID: 30693609. doi:10.1111/wrr.12701                                                                                                            | Study did not include predetermined outcomes, related to diabetic complications      |
| Van den Eynde MDG, Geleijnse JM, Scheijen LJLM, Hanssen NMJ, Dower JJ, Afman LA, Stehouwer CDA, Hollman PCH, Schalkwijk CG. 2018. Quercetin, but Not Epicatechin, Decreases Plasma Concentrations of Methylglyoxal in Adults in a Randomized, Double-Blind, Placebo-Controlled, Crossover Trial with Pure Flavonoids. PMID: 30398646. doi:10.1093/jn/nxy236                                                                                         | Study conducted on non-target group of patients (non-diabetic, diabetes type 1 etc.) |
| Karkabounas S, Papadopoulos N, Anastasiadou C, Gubili C, Peschos D, Daskalou T, Fikioris N, Simos YV, Kontargiris E, Gianakopoulos X, Ragos V, Chatzidimitriou M. 2018. Effects of $\alpha$ -Lipoic Acid, Carnosine, and Thiamine Supplementation in Obese Patients with Type 2 Diabetes Mellitus: A Randomized, Double-Blind Study. PMID: 30311825. doi:10.1089/jmf.2018.0007                                                                      | Study did not include predetermined outcomes, related to diabetic complications      |
| Zarezadeh M, Saedisomeolia A, Khorshidi M, Kord Varkane H, Makhdoomi Arzati M, Abdollahi M, Yekaninejad MS, Hashemi R, Effatpanah M, Mohammadzadeh Honarvar N. 2018. Asymmetric dimethylarginine and soluble inter-cellular adhesion molecule-1 serum levels alteration following ginger supplementation in patients with type 2 diabetes: a randomized double-blind, placebo-controlled clinical trial. PMID: 30099412. doi:10.1515/jcim-2018-0019 | Study did not include predetermined outcomes, related to diabetic complications      |

|                                                                                                                                                                                                                                                                                                                                                                                    |                                                                                      |
|------------------------------------------------------------------------------------------------------------------------------------------------------------------------------------------------------------------------------------------------------------------------------------------------------------------------------------------------------------------------------------|--------------------------------------------------------------------------------------|
| Wang J, Yu Y, Li X, Li D, Xu C, Yuan J, Wei S, Li X, Yang K, Zheng D, Tang Y, Yang H, Wu T, He M. 2018. Serum uric acid levels and decreased estimated glomerular filtration rate in patients with type 2 diabetes: A cohort study and meta-analysis. PMID: 30003679. doi:10.1002/dmrr.3046                                                                                        | Study did not include predetermined outcomes, related to diabetic complications      |
| Jiang DQ, Xu LC, Jiang LL, Li MX, Wang Y. 2018. Fasudil combined with methylcobalamin or lipoic acid can improve the nerve conduction velocity in patients with diabetic peripheral neuropathy: A meta-analysis. PMID: 29979431. doi:10.1097/MD.00000000000011390                                                                                                                  | Drug effect study                                                                    |
| Khodabandehloo H, Seyyedebrahimi S, Esfahani EN, Razi F, Meshkani R. 2018. Resveratrol supplementation decreases blood glucose without changing the circulating CD14(+)CD16(+) monocytes and inflammatory cytokines in patients with type 2 diabetes: a randomized, double-blind, placebo-controlled study. PMID: 29914666. doi:10.1016/j.nutres.2018.03.015                       | Study did not include predetermined outcomes, related to diabetic complications      |
| Navarro-González JF, Sánchez-Niño MD, Donate-Correa J, Martín-Núñez E, Ferri C, Pérez-Delgado N, Górriz JL, Martínez-Castelao A, Ortiz A, Mora-Fernández C. 2018. Effects of Pentoxifylline on Soluble Klotho Concentrations and Renal Tubular Cell Expression in Diabetic Kidney Disease. PMID: 29866645. doi:10.2337/dc18-0078                                                   | Drug effect study                                                                    |
| Rabizadeh S, Dehghani Firouzabadi F, Noshad S, Esteghamati S, Afarideh M, Ghajar A, Ganji M, Saadat M, Heidari B, Najafi MT, Nakhjavani M, Esteghamati A. 2018. Beneficial Effects of Pentoxifylline Plus Losartan Dual Therapy in Type 2 Diabetes with Nephropathy. PMID: 29753374. doi:10.1016/j.amjms.2017.12.015                                                               | Drug effect study                                                                    |
| Fayh APT, Borges K, Cunha GS, Krause M, Rocha R, de Bittencourt PIH Jr, Moreira JCF, Friedman R, da Silva Rossato J, Fernandes JR, Reischak-Oliveira A. 2018. Effects of n-3 fatty acids and exercise on oxidative stress parameters in type 2 diabetic: a randomized clinical trial. PMID: 29713249. doi:10.1186/s12970-018-0222-2                                                | Study did not include predetermined outcomes, related to diabetic complications      |
| Edmonds ME, Bodansky HJ, Boulton AJM, Chadwick PJ, Dang CN, D'Costa R, Johnston A, Kennon B, Leese G, Rajbhandari SM, Serena TE, Young MJ, Stewart JE, Tucker AT, Carter MJ. 2018. Multicenter, randomized controlled, observer-blinded study of a nitric oxide generating treatment in foot ulcers of patients with diabetes-ProNOx1 study. PMID: 29617058. doi:10.1111/wrr.12630 | Study design did not include administration of antioxidants                          |
| Carlström M, Larsson SC. 2018. Coffee consumption and reduced risk of developing type 2 diabetes: a systematic review with meta-analysis. PMID: 29590460. doi:10.1093/nutrit/nuy014                                                                                                                                                                                                | Ineligible study type                                                                |
| El-Aal AA, El-Ghffar EAA, Ghali AA, Zughbur MR, Sirdah MM. 2018. The effect of vitamin C and/or E supplementations on type 2 diabetic adult males under metformin treatment: A single-blinded randomized controlled clinical trial. PMID: 29571976. doi:10.1016/j.dsx.2018.03.013                                                                                                  | Study did not include predetermined outcomes, related to diabetic complications      |
| Sepahi S, Mohajeri SA, Hosseini SM, Khodaverdi E, Shoeibi N, Namdari M, Tabassi SAS. 2018. Effects of Crocin on Diabetic Maculopathy: A Placebo-Controlled Randomized Clinical Trial. PMID: 29550187. doi:10.1016/j.ajo.2018.03.007                                                                                                                                                | Study conducted on non-target group of patients (non-diabetic, diabetes type 1 etc.) |
| Homayouni F, Haidari F, Hedayati M, Zakerkish M, Ahmadi K. 2018. Blood pressure lowering and anti-inflammatory effects of hesperidin in type 2 diabetes; a randomized double-blind controlled clinical trial. PMID: 29468764. doi:10.1002/ptr.6046                                                                                                                                 | Study did not include predetermined outcomes, related to diabetic complications      |

|                                                                                                                                                                                                                                                                                                                                                                                                                                                                                                                                                                                                  |                                                                                      |
|--------------------------------------------------------------------------------------------------------------------------------------------------------------------------------------------------------------------------------------------------------------------------------------------------------------------------------------------------------------------------------------------------------------------------------------------------------------------------------------------------------------------------------------------------------------------------------------------------|--------------------------------------------------------------------------------------|
| Panahi Y, Khalili N, Sahebi E, Namazi S, Simental-Mendía LE, Majeed M, Sahebkar A. 2018. Effects of Curcuminoids Plus Piperine on Glycemic, Hepatic and Inflammatory Biomarkers in Patients with Type 2 Diabetes Mellitus: A Randomized Double-Blind Placebo-Controlled Trial. PMID: 29458218. doi:10.1055/s-0044-101752                                                                                                                                                                                                                                                                         | Study did not include predetermined outcomes, related to diabetic complications      |
| Raygan F, Ostadmohammadi V, Bahmani F, Asemi Z. 2018. The effects of vitamin D and probiotic co-supplementation on mental health parameters and metabolic status in type 2 diabetic patients with coronary heart disease: A randomized, double-blind, placebo-controlled trial. PMID: 29432877. doi:10.1016/j.pnpbp.2018.02.007                                                                                                                                                                                                                                                                  | Study design did not include administration of antioxidants                          |
| Mashhadi NS, Zakerkish M, Mohammadiasl J, Zarei M, Mohammadshahi M, Haghighizadeh MH. 2018. Astaxanthin improves glucose metabolism and reduces blood pressure in patients with type 2 diabetes mellitus. PMID: 29384321. doi:10.6133/apjcn.052017.11                                                                                                                                                                                                                                                                                                                                            | Study did not include predetermined outcomes, related to diabetic complications      |
| Vitamin E in Neuroprotection Study (VENUS) Investigators; Hor CP, Fung WY, Ang HA, Lim SC, Kam LY, Sim SW, Lim LH, Choon WY, Wong JW, Ch'ng ASH, Beh KKM, Wee HC, Ong LM, Khan NAK, Sulaiman SAS, Shuaib IL, Bakar A, Yusof Y, Yusof YM, Abu Bakar F, Tang WS, Teh HL, Wahid NA, Saaidin S, Idris N, Yoon CK, Ong HN, Ganapathy JT, Loo CE, Samy MM, Zainal H, Dharan SCS, Ooi BY, Teoh PY, Tye YL, Yeoh CA, Low DW, Looi I, Yuen KH. 2018. Efficacy of Oral Mixed Tocotrienols in Diabetic Peripheral Neuropathy: A Randomized Clinical Trial. PMID: 29379943. doi:10.1001/jamaneurol.2017.4609 | Study conducted on non-target group of patients (non-diabetic, diabetes type 1 etc.) |
| Wada T, Hosoya T, Honda D, Sakamoto R, Narita K, Sasaki T, Okui D, Kimura K. 2018. Uric acid-lowering and renoprotective effects of topiroxostat, a selective xanthine oxidoreductase inhibitor, in patients with diabetic nephropathy and hyperuricemia: a randomized, double-blind, placebo-controlled, parallel-group study (UPWARD study). PMID: 29372470. doi:10.1007/s10157-018-1530-1                                                                                                                                                                                                     | Drug effect study                                                                    |
| Fogacci F, Tocci G, Presta V, Fratter A, Borghi C, Cicero AFG. 2019. Effect of resveratrol on blood pressure: A systematic review and meta-analysis of randomized, controlled, clinical trials. PMID: 29359958. doi:10.1080/10408398.2017.1422480                                                                                                                                                                                                                                                                                                                                                | Ineligible study type                                                                |
| Dandona P, Ghanim H, Abuaysheh S, Green K, Dhindsa S, Makdissi A, Batra M, Kuhadiya ND, Chaudhuri A. 2018. Exenatide Increases IL-1RA Concentration and Induces Nrf-2-Keap-1-Regulated Antioxidant Enzymes: Relevance to $\beta$ -Cell Function. PMID: 29346597. doi:10.1210/jc.2017-02343                                                                                                                                                                                                                                                                                                       | Drug effect study                                                                    |
| Pilemann-Lyberg S, Persson F, Frystyk J, Rossing P. 2018. The effect of uric acid lowering treatment on albuminuria and renal function in Type 1 diabetes: a randomized clinical trial. PMID: 29315768. doi:10.1111/dme.13577                                                                                                                                                                                                                                                                                                                                                                    | Study conducted on non-target group of patients (non-diabetic, diabetes type 1 etc.) |
| Mohseni S, Bayani M, Bahmani F, Tajabadi-Ebrahimi M, Bayani MA, Jafari P, Asemi Z. 2018. The beneficial effects of probiotic administration on wound healing and metabolic status in patients with diabetic foot ulcer: A randomized, double-blind, placebo-controlled trial. PMID: 29193662. doi:10.1002/dmrr.2970                                                                                                                                                                                                                                                                              | Study conducted on non-target group of patients (non-diabetic, diabetes type 1 etc.) |
| Wang XT, Lin HX, Xu SA, Lu YK. 2017. Lipoic Acid Combined with Epalrestat versus Lipoic Acid in Treating Diabetic Peripheral Neuropathy: A Meta-analysis. PMID: 29125108. doi:10.3881/j.issn.1000-503X.2017.05.010                                                                                                                                                                                                                                                                                                                                                                               | Article could not be accessed                                                        |



|                                                                                                                                                                                                                                                                                                                                                                                                                                                                   |                                                                                      |
|-------------------------------------------------------------------------------------------------------------------------------------------------------------------------------------------------------------------------------------------------------------------------------------------------------------------------------------------------------------------------------------------------------------------------------------------------------------------|--------------------------------------------------------------------------------------|
| Kandhare AD, Mukherjee A, Bodhankar SL. 2017. Antioxidant for treatment of diabetic nephropathy: A systematic review and meta-analysis. PMID: 29108777. doi:10.1016/j.cbi.2017.10.031                                                                                                                                                                                                                                                                             | Ineligible study type                                                                |
| Voroneanu L, Siriopol D, Dumea R, Badarau S, Kanbay M, Afsar B, Gavrilovici C, Covic A. 2017. Addition of silymarin to renin-angiotensin system blockers in normotensive patients with type 2 diabetes mellitus and proteinuria: a prospective randomized trial. PMID: 28948420. doi:10.1007/s11255-017-1697-5                                                                                                                                                    | Study design did not include administration of antioxidants                          |
| Gillani SW, Sulaiman SAS, Abdul MIM, Baig MR. 2017. Combined effect of metformin with ascorbic acid versus acetyl salicylic acid on diabetes-related cardiovascular complication; a 12-month single blind multicenter randomized control trial. PMID: 28807030. doi:10.1186/s12933-017-0584-9                                                                                                                                                                     | Drug effect study                                                                    |
| Mirmiran P, Hosseinpour-Niazi S, Azizi F. 2018. Therapeutic lifestyle change diet enriched in legumes reduces oxidative stress in overweight type 2 diabetic patients: a crossover randomised clinical trial. PMID: 28722030. doi:10.1038/ejcn.2017.113                                                                                                                                                                                                           | Study did not include predetermined outcomes, related to diabetic complications      |
| Bolignano D, Cernaro V, Gembillo G, Baggetta R, Buemi M, D'Arrigo G. 2017. Antioxidant agents for delaying diabetic kidney disease progression: A systematic review and meta-analysis. PMID: 28570649. doi:10.1371/journal.pone.0178699                                                                                                                                                                                                                           | Ineligible study type                                                                |
| Razzaghi R, Pidar F, Momen-Heravi M, Bahmani F, Akbari H, Asemi Z. 2018. Magnesium Supplementation and the Effects on Wound Healing and Metabolic Status in Patients with Diabetic Foot Ulcer: a Randomized, Double-Blind, Placebo-Controlled Trial. PMID: 28540570. doi:10.1007/s12011-017-1056-5                                                                                                                                                                | Study conducted on non-target group of patients (non-diabetic, diabetes type 1 etc.) |
| Momen-Heravi M, Barahimi E, Razzaghi R, Bahmani F, Gilasi HR, Asemi Z. 2017. The effects of zinc supplementation on wound healing and metabolic status in patients with diabetic foot ulcer: A randomized, double-blind, placebo-controlled trial. PMID: 28395131. doi:10.1111/wrr.12537                                                                                                                                                                          | Study conducted on non-target group of patients (non-diabetic, diabetes type 1 etc.) |
| Sucher S, Markova M, Hornemann S, Pivovarov O, Rudovich N, Thomann R, Schneeweiss R, Rohn S, Pfeiffer AFH. 2017. Comparison of the effects of diets high in animal or plant protein on metabolic and cardiovascular markers in type 2 diabetes: A randomized clinical trial. PMID: 28181738. doi:10.1111/dom.12901                                                                                                                                                | Study did not include predetermined outcomes, related to diabetic complications      |
| Zhu B, Wu X, Bi Y, Yang Y. 2017. Effect of bilirubin concentration on the risk of diabetic complications: A meta-analysis of epidemiologic studies. PMID: 28134328. doi:10.1038/srep41681                                                                                                                                                                                                                                                                         | Study did not include predetermined outcomes, related to diabetic complications      |
| Sun H, Yao W, Tang Y, Zhuang W, Wu D, Huang S, Sheng H. 2017. Urinary exosomes as a novel biomarker for evaluation of $\alpha$ -lipoic acid's protective effect in early diabetic nephropathy. PMID: 28116765. doi:10.1002/jcla.22129                                                                                                                                                                                                                             | Study conducted on non-target group of patients (non-diabetic, diabetes type 1 etc.) |
| Gasca-Lozano LE, Lucano-Landeros S, Ruiz-Mercado H, Salazar-Montes A, Sandoval-Rodríguez A, Garcia-Bañuelos J, Santos-Garcia A, Davila-Rodriguez JR, Navarro-Partida J, Bojórquez-Sepúlveda H, Castañeda-Gomez J, Domínguez-Rosales J, Ruiz-Arcos MA, Sánchez-Parada MG, Armendariz-Borunda J. 2017. Pirfenidone Accelerates Wound Healing in Chronic Diabetic Foot Ulcers: A Randomized, Double-Blind Controlled Trial. PMID: 29675430. doi:10.1155/2017/3159798 | Drug effect study                                                                    |

|                                                                                                                                                                                                                                                                                                                                                                      |                                                                                      |
|----------------------------------------------------------------------------------------------------------------------------------------------------------------------------------------------------------------------------------------------------------------------------------------------------------------------------------------------------------------------|--------------------------------------------------------------------------------------|
| Borgi L, McMullan C, Wohlhueter A, Curhan GC, Fisher ND, Forman JP. 2017. Effect of Uric Acid-Lowering Agents on Endothelial Function: A Randomized, Double-Blind, Placebo-Controlled Trial. PMID: 28028194. doi:10.1161/HYPERTENSIONAHA.116.08488                                                                                                                   | Drug effect study                                                                    |
| Soleimani A, Zarrati Mojarrad M, Bahmani F, Taghizadeh M, Ramezani M, Tajabadi-Ebrahimi M, Jafari P, Esmailzadeh A, Asemi Z. 2017. Probiotic supplementation in diabetic hemodialysis patients has beneficial metabolic effects. PMID: 27927601. doi:10.1016/j.kint.2016.09.040                                                                                      | Study conducted on non-target group of patients (non-diabetic, diabetes type 1 etc.) |
| Han Y, Wang M, Shen J, Zhang Z, Zhao M, Huang J, Chen Y, Chen Z, Hu Y, Wang Y. 2018. Differential efficacy of methylcobalamin and alpha-lipoic acid treatment on symptoms of diabetic peripheral neuropathy. PMID: 27901334. doi:10.23736/S0391-1977.16.02505-0                                                                                                      | Study design did not include administration of antioxidants                          |
| Lafuente M, Ortín L, Argente M, Guindo JL, López-Bernal MD, López-Román FJ, García MJ, Domingo JC, Lajara J. 2017. COMBINED INTRAVITREAL RANIBIZUMAB AND ORAL SUPPLEMENTATION WITH DOCOSAHEXAENOIC ACID AND ANTIOXIDANTS FOR DIABETIC MACULAR EDEMA: Two-Year Randomized Single-Blind Controlled Trial Results. PMID: 27787443. doi:10.1097/IAE.0000000000001363     | Study did not include predetermined outcomes, related to diabetic complications      |
| Stonehouse W, Brinkworth GD, Thompson CH, Abeywardena MY. 2016. Short term effects of palm-tocotrienol and palm-carotenes on vascular function and cardiovascular disease risk: A randomised controlled trial. PMID: 27760402. doi:10.1016/j.atherosclerosis.2016.10.027                                                                                             | Study did not include predetermined outcomes, related to diabetic complications      |
| Du L, Ma J, Zhang X. 2017. Higher Serum Uric Acid May Contribute to Cerebral Infarction in Patients with Type 2 Diabetes Mellitus: a Meta-Analysis. PMID: 27696108. doi:10.1007/s12031-016-0848-y                                                                                                                                                                    | Study design did not include administration of antioxidants                          |
| Bahmani F, Kia M, Soleimani A, Mohammadi AA, Asemi Z. 2016. The effects of selenium supplementation on biomarkers of inflammation and oxidative stress in patients with diabetic nephropathy: a randomised, double-blind, placebo-controlled trial. PMID: 27647263. doi:10.1017/S0007114516003251                                                                    | Study did not include predetermined outcomes, related to diabetic complications      |
| Khatami PG, Soleimani A, Sharifi N, Aghadavod E, Asemi Z. 2016. The effects of high-dose vitamin E supplementation on biomarkers of kidney injury, inflammation, and oxidative stress in patients with diabetic nephropathy: A randomized, double-blind, placebo-controlled trial. PMID: 27578124. doi:10.1016/j.jacl.2016.02.021                                    | Study conducted on non-target group of patients (non-diabetic, diabetes type 1 etc.) |
| Jin SM, Han KA, Yu JM, Sohn TS, Choi SH, Chung CH, Park IeB, Rhee EJ, Baik SH, Park TS, Lee IK, Ko SH, Hwang YC, Cha BS, Lee HW, Nam MS, Lee MK. 2016. Probucol in Albuminuric Type 2 Diabetes Mellitus Patients on Renin-Angiotensin System Blockade: A 16-Week, Randomized, Double-Blind, Placebo-Controlled Trial. PMID: 27493100. doi:10.1161/ATVBAHA.116.308034 | Drug effect study                                                                    |
| Voroneanu L, Nistor I, Dumea R, Apetrii M, Covic A. 2016. Silymarin in Type 2 Diabetes Mellitus: A Systematic Review and Meta-Analysis of Randomized Controlled Trials. PMID: 27340676. doi:10.1155/2016/5147468                                                                                                                                                     | Ineligible study type                                                                |
| Borges CM, Papadimitriou A, Duarte DA, Lopes de Faria JM, Lopes de Faria JB. 2016. The use of green tea polyphenols for treating residual albuminuria in diabetic nephropathy: A double-blind randomised clinical trial. PMID: 27320846. doi:10.1038/srep28282                                                                                                       | Study conducted on non-target group of patients (non-diabetic, diabetes type 1 etc.) |

|                                                                                                                                                                                                                                                                                                                                                                                                                          |                                                                                      |
|--------------------------------------------------------------------------------------------------------------------------------------------------------------------------------------------------------------------------------------------------------------------------------------------------------------------------------------------------------------------------------------------------------------------------|--------------------------------------------------------------------------------------|
| Kato S, Ando M, Mizukoshi T, Nagata T, Katsuno T, Kosugi T, Tsuboi N, Maruyama S. 2016. Randomized control trial for the assessment of the anti-albuminuric effects of topiroxostat in hyperuricemic patients with diabetic nephropathy (the ETUDE study). PMID: 27303100. doi:                                                                                                                                          | Drug effect study                                                                    |
| Atkin M, Laight D, Cummings MH. 2016. The effects of garlic extract upon endothelial function, vascular inflammation, oxidative stress and insulin resistance in adults with type 2 diabetes at high cardiovascular risk. A pilot double blind randomized placebo controlled trial. PMID: 26954484. doi:10.1016/j.jdiacomp.2016.01.003                                                                                   | Study did not include predetermined outcomes, related to diabetic complications      |
| Rafraf M, Bazyun B, Sarabchian MA, Safaeiyan A, Gargari BP. 2016. Vitamin E Improves Serum Paraoxonase-1 Activity and Some Metabolic Factors in Patients with Type 2 Diabetes: No Effects on Nitrite/Nitrate Levels. PMID: 26886716. doi:10.1080/07315724.2015.1116896                                                                                                                                                   | Study did not include predetermined outcomes, related to diabetic complications      |
| Bahmani F, Kia M, Soleimani A, Asemi Z, Esmailzadeh A. 2016. Effect of Selenium Supplementation on Glycemic Control and Lipid Profiles in Patients with Diabetic Nephropathy. PMID: 26686847. doi:10.1007/s12011-015-0600-4                                                                                                                                                                                              | Study did not include predetermined outcomes, related to diabetic complications      |
| Ziegler D, Low PA, Freeman R, Tritschler H, Vinik AI. 2016. Predictors of improvement and progression of diabetic polyneuropathy following treatment with $\alpha$ -lipoic acid for 4 years in the NATHAN 1 trial. PMID: 26651260. doi:10.1016/j.jdiacomp.2015.10.018                                                                                                                                                    | Study conducted on non-target group of patients (non-diabetic, diabetes type 1 etc.) |
| Zhu H, Chen X, Cai G, Zheng Y, Liu M, Liu W, Yao H, Wang Y, Li W, Wu H, Lun L, Zhang J, Guan X, Yin S, Zhuang X, Li J, Liu Y, Zhou C. 2016. Telmisartan combined with probucol effectively reduces urinary protein in patients with type 2 diabetes: A randomized double-blind placebo-controlled multicenter clinical study. PMID: 26458146. doi:10.1111/1753-0407.12347                                                | Drug effect study                                                                    |
| Zemestani M, Rafraf M, Asghari-Jafarabadi M. 2016. Chamomile tea improves glycemic indices and antioxidants status in patients with type 2 diabetes mellitus. PMID: 26437613. doi:10.1016/j.nut.2015.07.011                                                                                                                                                                                                              | Study did not include predetermined outcomes, related to diabetic complications      |
| Singh RK, Gupta B, Tripathi K, Singh SK. 2016. Anti oxidant potential of Metformin and Pioglitazone in Type 2 Diabetes Mellitus: Beyond their anti glycemic effect. PMID: 26341927. doi:10.1016/j.dsx.2015.08.016                                                                                                                                                                                                        | Drug effect study                                                                    |
| Rodríguez-Carrizalez AD, Castellanos-González JA, Martínez-Romero EC, Miller-Arrevillaga G, Román-Pintos LM, Pacheco-Moisés FP, Miranda-Díaz AG. 2016. The antioxidant effect of ubiquinone and combined therapy on mitochondrial function in blood cells in non-proliferative diabetic retinopathy: A randomized, double-blind, phase IIa, placebo-controlled study. PMID: 26207797. doi:10.1179/1351000215Y.0000000032 | Study did not include predetermined outcomes, related to diabetic complications      |
| Chous AP, Richer SP, Gerson JD, Kowluru RA. 2016. The Diabetes Visual Function Supplement Study (DiVFuSS). PMID: 26089210. doi:10.1136/bjophthalmol-2014-306534                                                                                                                                                                                                                                                          | Study conducted on non-target group of patients (non-diabetic, diabetes type 1 etc.) |
| Tian ML, Shen Y, Sun ZL, Zha Y. 2015. Efficacy and safety of combining pentoxifylline with angiotensin-converting enzyme inhibitor or angiotensin II receptor blocker in diabetic nephropathy: a meta-analysis. PMID: 25862237. doi:10.1007/s11255-015-0968-2                                                                                                                                                            | Drug effect study                                                                    |

|                                                                                                                                                                                                                                                                                                                                                                  |                                                                                      |
|------------------------------------------------------------------------------------------------------------------------------------------------------------------------------------------------------------------------------------------------------------------------------------------------------------------------------------------------------------------|--------------------------------------------------------------------------------------|
| Ebrahimpour Koujan S, Gargari BP, Mobasser M, Valizadeh H, Asghari-Jafarabadi M. 2015. Effects of Silybum marianum (L.) Gaertn. (silymarin) extract supplementation on antioxidant status and hs-CRP in patients with type 2 diabetes mellitus: a randomized, triple-blind, placebo-controlled clinical trial. PMID: 25765835. doi:10.1016/j.phymed.2014.12.010  | Study conducted on non-target group of patients (non-diabetic, diabetes type 1 etc.) |
| Jiang DQ, Li MX, Wang Y, Wang Y. 2015. Effects of prostaglandin E1 plus methylcobalamin alone and in combination with lipoic acid on nerve conduction velocity in patients with diabetic peripheral neuropathy: A meta-analysis. PMID: 25800109. doi:10.1016/j.neulet.2015.03.037                                                                                | Study conducted on non-target group of patients (non-diabetic, diabetes type 1 etc.) |
| Palma-Duran SA, Vlassopoulos A, Lean M, Govan L, Combet E. 2017. Nutritional intervention and impact of polyphenol on glycohemoglobin (HbA1c) in non-diabetic and type 2 diabetic subjects: Systematic review and meta-analysis. PMID: 25746842. doi:10.1080/10408398.2014.973932                                                                                | Ineligible study type                                                                |
| Yubero-Serrano EM, Woodward M, Poretsky L, Vlassara H, Striker GE; AGE-less Study Group. 2015. Effects of sevelamer carbonate on advanced glycation end products and antioxidant/pro-oxidant status in patients with diabetic kidney disease. PMID: 25710801. doi:10.2215/CJN.07750814                                                                           | Drug effect study                                                                    |
| Kaatabi H, Bamosa AO, Badar A, Al-Elq A, Abou-Hozafa B, Lebda F, Al-Khadra A, Al-Almaie S. 2015. Nigella sativa improves glycemic control and ameliorates oxidative stress in patients with type 2 diabetes mellitus: placebo controlled participant blinded clinical trial. PMID: 25706772. doi:10.1371/journal.pone.0113486                                    | Study did not include predetermined outcomes, related to diabetic complications      |
| Davies MJ, Trujillo A, Vijapurkar U, Damaraju CV, Meininger G. 2015. Effect of canagliflozin on serum uric acid in patients with type 2 diabetes mellitus. PMID: 25600248. doi:10.1111/dom.12439                                                                                                                                                                 | Drug effect study                                                                    |
| Aliasgharzadeh A, Dehghan P, Gargari BP, Asghari-Jafarabadi M. 2015. Resistant dextrin, as a prebiotic, improves insulin resistance and inflammation in women with type 2 diabetes: a randomised controlled clinical trial. PMID: 27028002. doi:10.1017/S0007114514003675                                                                                        | Study did not include predetermined outcomes, related to diabetic complications      |
| Silva S, Bronze MR, Figueira ME, Siwy J, Mischak H, Combet E, Mullen W. 2015. Impact of a 6-wk olive oil supplementation in healthy adults on urinary proteomic biomarkers of coronary artery disease, chronic kidney disease, and diabetes (types 1 and 2): a randomized, parallel, controlled, double-blind study. PMID: 25527749. doi:10.3945/ajcn.114.094219 | Study conducted on non-target group of patients (non-diabetic, diabetes type 1 etc.) |
| Navarro-González JF, Mora-Fernández C, Muros de Fuentes M, Chahin J, Méndez ML, Gallego E, Macía M, del Castillo N, Rivero A, Getino MA, García P, Jarque A, García J. 2015. Effect of pentoxifylline on renal function and urinary albumin excretion in patients with diabetic kidney disease: the PREDIAN trial. PMID: 24970885. doi:10.1681/ASN.2014010012    | Drug effect study                                                                    |
| Rajanandh MG, Kosey S, Prathiksha G. 2014. Assessment of antioxidant supplementation on the neuropathic pain score and quality of life in diabetic neuropathy patients - a randomized controlled study. PMID: 24905305. doi:10.1016/j.pharep.2013.08.003                                                                                                         | Study did not include predetermined outcomes, related to diabetic complications      |
| Martynyuk L, Martynyuk L, Ruzhitska O, Martynyuk O. 2014. Effect of the herbal combination Canephron N on diabetic nephropathy in patients with diabetes mellitus: results of a comparative cohort study. PMID: 24738695. doi:10.1089/acm.2013.0400                                                                                                              | Study design did not include administration of antioxidants                          |

|                                                                                                                                                                                                                                                                                                                                                                 |                                                                                      |
|-----------------------------------------------------------------------------------------------------------------------------------------------------------------------------------------------------------------------------------------------------------------------------------------------------------------------------------------------------------------|--------------------------------------------------------------------------------------|
| Schneider MP, Schneider A, Jumar A, Kistner I, Ott C, Schmieder RE. 2014. Effects of folic acid on renal endothelial function in patients with diabetic nephropathy: results from a randomized trial. PMID: 24724807. doi:10.1042/CS20140111                                                                                                                    | Study did not include predetermined outcomes, related to diabetic complications      |
| Raghavan RP, Laight DW, Cummings MH. 2014. Aspirin in type 2 diabetes, a randomised controlled study: effect of different doses on inflammation, oxidative stress, insulin resistance and endothelial function. PMID: 24372992. doi:10.1111/ijcp.12310                                                                                                          | Drug effect study                                                                    |
| Nikooyeh B, Neyestani TR, Tayebinejad N, Alavi-Majd H, Shariatzadeh N, Kalayi A, Zahedirad M, Heravifard S, Salekzamani S. 2014. Daily intake of vitamin D- or calcium-vitamin D-fortified Persian yogurt drink (doogh) attenuates diabetes-induced oxidative stress: evidence for antioxidative properties of vitamin D. PMID: 23829785. doi:10.1111/jhn.12142 | Study design did not include administration of antioxidants                          |
| Gutierrez AD, Duran-Valdez E, Robinson I, de Serna DG, Schade DS. 2013. Does short-term vitamin C reduce cardiovascular risk in type 2 diabetes?. PMID: 23757614. doi:10.4158/EP12431.OR                                                                                                                                                                        | Study did not include predetermined outcomes, related to diabetic complications      |
| Mahjabeen W, Khan DA, Mirza SA. 2022. Role of resveratrol supplementation in regulation of glucose hemostasis, inflammation and oxidative stress in patients with diabetes mellitus type 2: A randomized, placebo-controlled trial. PMID: 36638933. doi:10.1016/j.ctim.2022.102819                                                                              | Study conducted on non-target group of patients (non-diabetic, diabetes type 1 etc.) |
| Nyambuya TM, Nkambule BB, Mazibuko-Mbeje SE, Mxinwa V, Mokgalaboni K, Orlando P, Silvestri S, Louw J, Tiano L, Dlodla PV. 2020. A Meta-Analysis of the Impact of Resveratrol Supplementation on Markers of Renal Function and Blood Pressure in Type 2 Diabetic Patients on Hypoglycemic Therapy. PMID: 33266114. doi:10.3390/molecules25235645                 | Study conducted on non-target group of patients (non-diabetic, diabetes type 1 etc.) |
| Xu Q, Pan J, Yu J, Liu X, Liu L, Zuo X, Wu P, Deng H, Zhang J, Ji A. 2013. Meta-analysis of methylcobalamin alone and in combination with lipoic acid in patients with diabetic peripheral neuropathy. PMID: 23664235. doi:10.1016/j.diabres.2013.03.033                                                                                                        | Ineligible study type                                                                |
| Domanico D, Fragiotta S, Cutini A, Carnevale C, Zompatori L, Vingolo EM. 2015. Circulating levels of reactive oxygen species in patients with nonproliferative diabetic retinopathy and the influence of antioxidant supplementation: 6-month follow-up. PMID: 25686055. doi:10.4103/0301-4738.151455                                                           | Ineligible study type                                                                |
